# Supplementary material
Source: PubMed Central journal article supplement (PMC3811588)
Supplement: JB.00505-13_zjb999092876so1.pdf [file JB.00505-13_zjb999092876so1.pdf]

Farrand *et al.* Figure S1

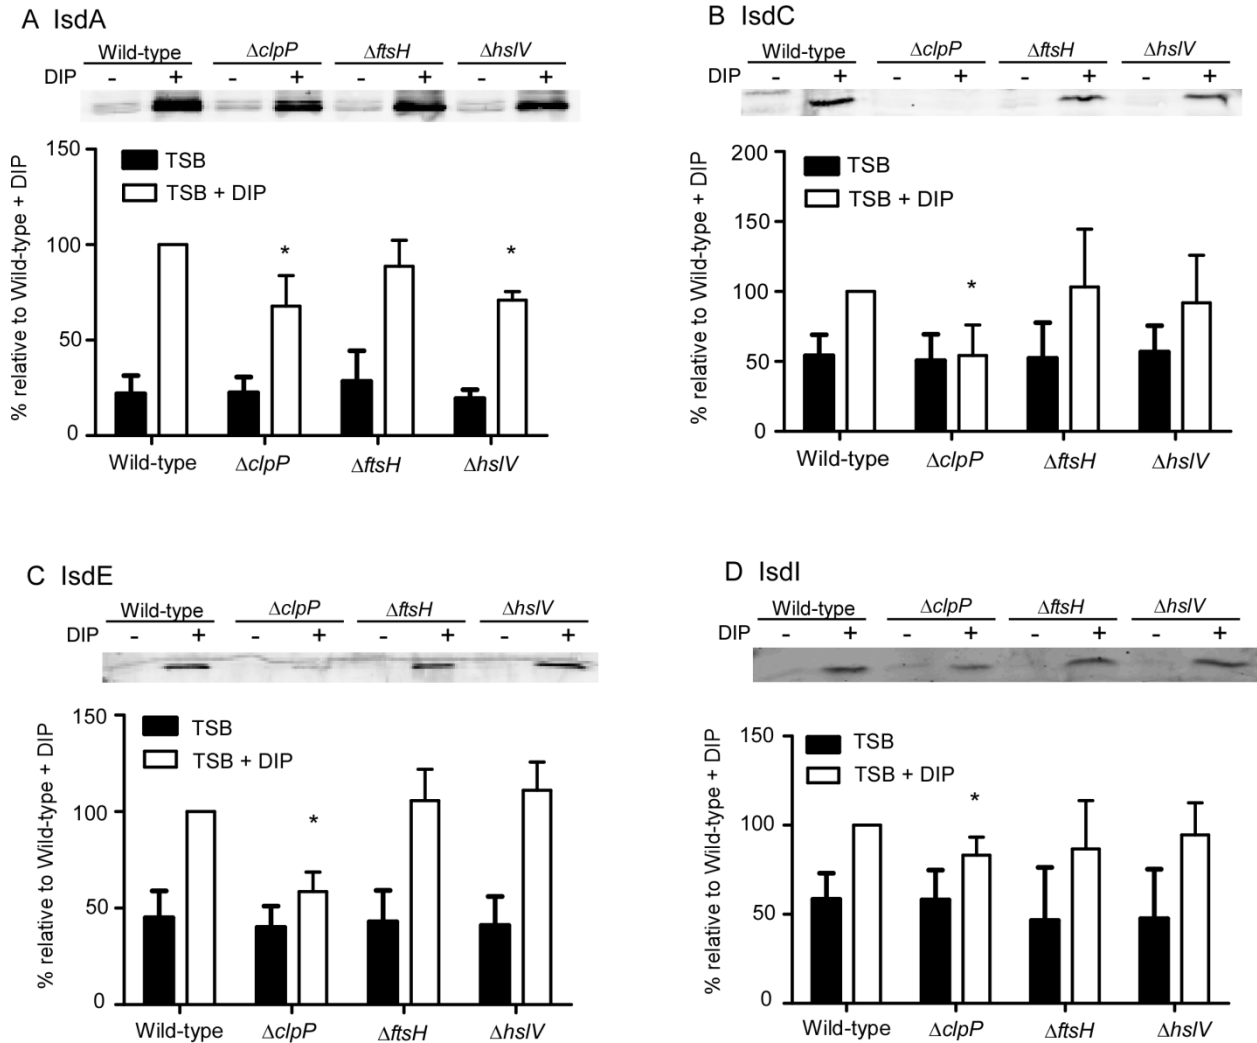

**Figure S1. Disruption of the *S. aureus* *clpP* proteolytic subunit reduces abundance of additional Isd proteins.** IsdA (A), IsdC (B), IsdE (C) and IsdI (D) protein levels analyzed by immunoblot. Wild-type *S. aureus* or strains inactivated for

*clpP*, *ftsH*, or *hslV* were grown in iron rich (TSB) or iron poor (TSB + DIP) media. Total protein in cell wall (IsdA) or protoplast (IsdC, IsdE and IsdI) fractions were normalized and separated by 15% SDS-PAGE. Proteins were transferred to nitrocellulose and probed with antibodies directed to IsdA, IsdC, IsdE or IsdI. Blots are representative of 3 independent experiments (*above*). Graphical representation of Isd protein abundance assessed by densitometry in TSB (black bars) or TSB + DIP (white bars) from immunoblot analysis (*below*). Error bars represent SEM. Asterisk denotes  $p < 0.006$  relative to wild-type in the respective condition as calculated by Student's *t*-test.

Farrand *et al.* Figure S2

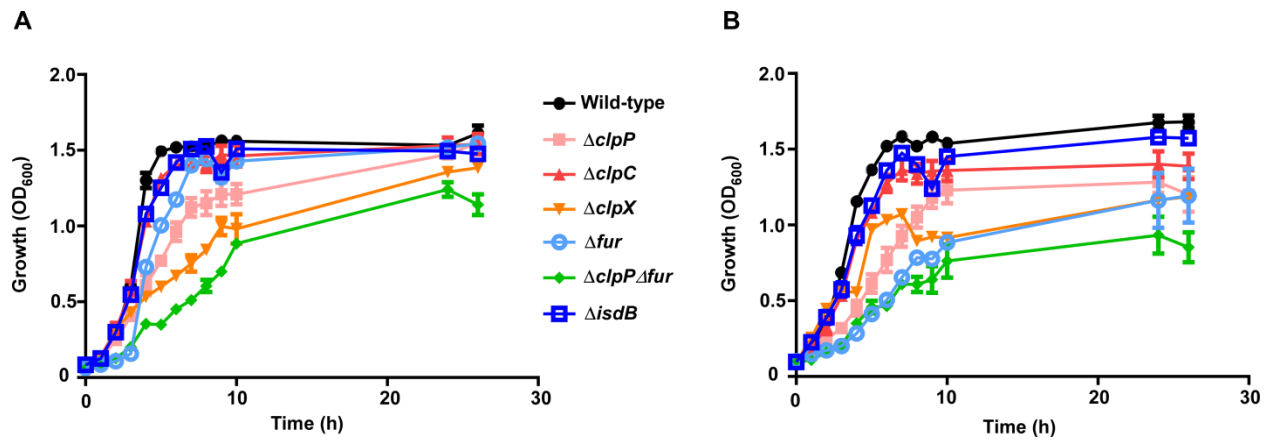

**Figure S2. Growth of *clp* mutants in iron-replete and iron-deplete media.** Wild-type *S. aureus* or strains inactivated for *clp*, *fur*, or *isdB* genes were grown in TSB (A) or TSB supplemented with the iron chelator EDDHA (1.5mM) (B). Bacterial growth was assessed every hour for 10 hours and at 24 hours by measuring the optical density of the cultures at 600 nm. Error bars represent SEM of triplicate samples.

**Farrand *et al.* Figure S3**

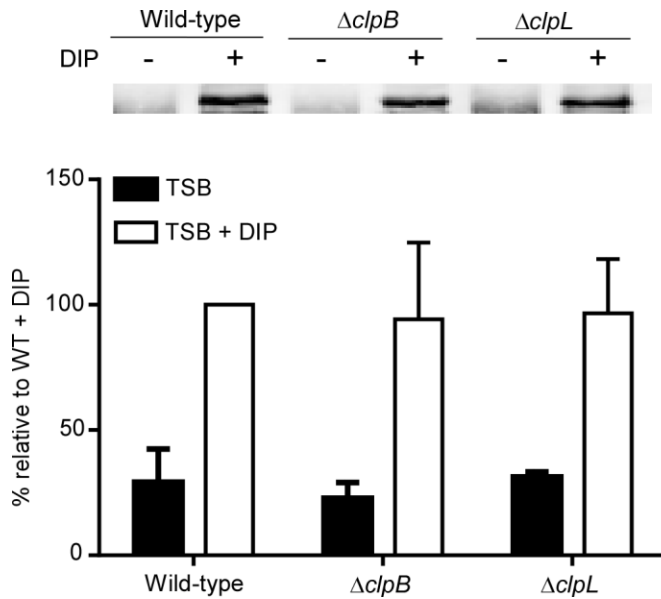

**Figure S3. IsdB abundance is unaffected by inactivation of *clpB* or *clpL*.** Wild-type *S. aureus* or strains inactivated for *clpB* or *clpL* were grown in TSB or TSB supplemented with the iron chelator DIP (1 mM). Total protein in cell wall fractions was normalized and separated by 15% SDS-PAGE. Proteins were transferred to nitrocellulose and probed with antibodies directed to IsdB. Blots are representative of 3 independent experiments (*above*). Graphical representation of Isd protein abundance assessed by densitometry in TSB (black bars) or TSB + DIP (white bars) from immunoblot analysis (*below*). Error bars represent SEM.

Farrand *et al.* Figure S4

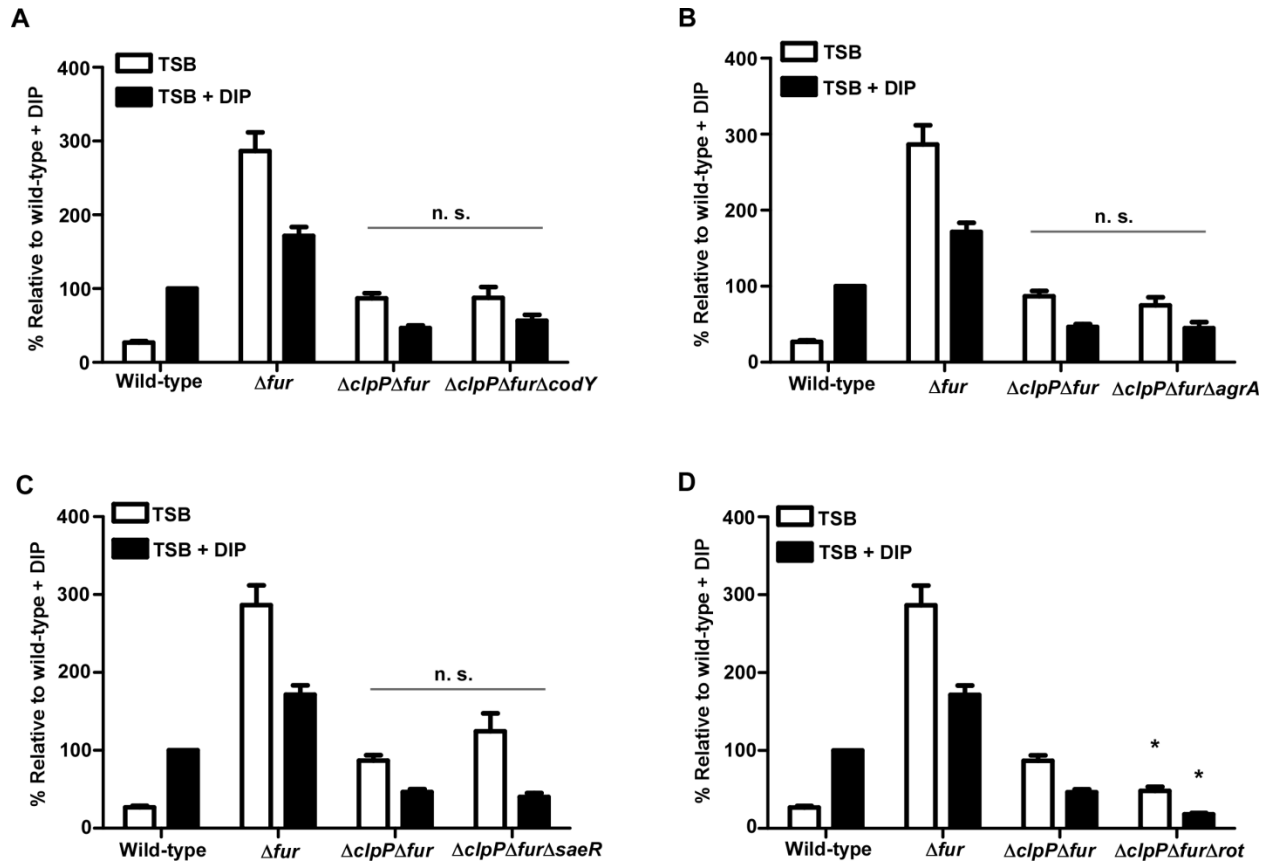

**Figure S4. Staphylococcal regulators do not impact *clp*-dependent *IsdB* regulation.** Wild-type *S. aureus* or strains inactivated for *fur*, *clpP* and *fur*, or *clpP*, *fur*, and prominent virulence regulators were grown in TSB (white bars) or TSB supplemented with DIP (black bars). *IsdB* protein levels were determined in cell wall fractions by Western blot. Data include at least three experiments. Error bars represent SEM. Asterisks denote  $p$  value < 0.008 compared to the  $\Delta clpP\Delta fur$  in the corresponding condition.

Farrand *et al.* Table S1

| Bacterial Strain                              | Description                                                                          | Reference  |
|-----------------------------------------------|--------------------------------------------------------------------------------------|------------|
| Newman                                        | <i>S. aureus</i> clinical isolate                                                    | (70)       |
| $\Delta clpP$                                 | Isogenic Newman <i>clpP</i> knockout                                                 | (40)       |
| $\Delta clpP + clpP$                          | Stable integration of <i>clpP</i> in chromosome of $\Delta clpP$                     | (40)       |
| $\Delta ftsH$                                 | Isogenic Newman <i>ftsH</i> knockout                                                 | (15)       |
| $\Delta hslUV$                                | Isogenic Newman <i>hslUV</i> knockout                                                | (15)       |
| $\Delta clpC$                                 | Isogenic Newman <i>clpC</i> knockout                                                 | This study |
| $\Delta clpX$                                 | Isogenic Newman <i>clpX</i> knockout                                                 | This study |
| $\Delta clpB$                                 | Isogenic Newman <i>clpB</i> knockout                                                 | This study |
| $\Delta clpL$                                 | Isogenic Newman <i>clpL</i> knockout                                                 | This study |
| $\Delta fur$                                  | Allelic replacement of <i>fur</i> with tetM cassette                                 | (72)       |
| $\Delta clpP\Delta fur$                       | Transduction of <i>fur::tetM</i> into $\Delta clpP$                                  | This study |
| $\Delta isdB$                                 | Allelic replacement of <i>isdB</i> with ermC                                         | (8)        |
| Newman pOS1 plgt                              | Newman transformed with pOS1 plgt empty vector                                       | (9)        |
| $\Delta clpP\Delta fur$ pOS1 plgt             | $\Delta clpP\Delta fur$ transformed with pOS1 plgt empty vector                      | This study |
| $\Delta clpP\Delta fur$ pOS1 plgt <i>fur</i>  | $\Delta clpP\Delta fur$ transformed with pOS1 plgt <i>fur</i> overexpression vector  | This study |
| $\Delta clpP\Delta fur$ pOS1 plgt <i>clpP</i> | $\Delta clpP\Delta fur$ transformed with pOS1 plgt <i>clpP</i> overexpression vector | This study |
| $\Delta clpP\Delta fur\Delta codY$            | Transduction of <i>codY::ermC</i> into $\Delta clpP\Delta fur$                       | This study |
| $\Delta clpP\Delta fur\Delta agrA$            | Transduction of <i>agrA::ermC</i> into $\Delta clpP\Delta fur$                       | This study |
| $\Delta clpP\Delta fur\Delta saeR$            | Transduction of <i>saeR::ermC</i> into $\Delta clpP\Delta fur$                       | This study |
| $\Delta clpP\Delta fur\Delta rot$             | Transduction of <i>fotermC</i> into $\Delta clpP\Delta fur$                          | This study |
